# Supplementary material for: Mendelian and Non-Mendelian Regulation of Gene Expression in Maize
Source: PLoS Genet. 2013 Jan 17;9(1):e1003202. doi: 10.1371/journal.pgen.1003202 (PMC3547793; doi:10.1371/journal.pgen.1003202)
Supplement: Table S2 — Paramutation-like genes detected in the maize IBM RIL population. a represents the number of standard deviations of difference between B73 and the RIL population, b represents the number of standard deviations between Mo17 and the population mean. The expression levels in the RILs and their parents were normalized by RPKM. c shows the standard deviation of expression levels in the RIL population. (XLS) [file pgen.1003202.s012.xls]

## Sheet: Sheet1
Table S2. Paramutation-like genes detected in the maize IBM RIL population a represents the number of standard deviations of difference between B73 and the RIL population, b represents the number of standard deviations between Mo17 and the population mean. The expression levels in the RILs and their parents were normalized by RPKM. c shows the standard deviation of expression levels in the RIL po…
Gene_Name	Chr.	Position	Function Description	AdjustBa	AdjustMb	pop_mean	pop_sdc	B73	Mo17
AC194878.3_FG001	9	25678361	unknown	3.25209	-0.231896	0.0935774	0.403532	1.4059	0
AC194878.3_FG002	9	25684857	unknown	4.65743	-0.220125	0.0879993	0.39977	1.9499	0
AC214817.3_FG007	6	1.54288e+08	receptor like protein kinase	4.67116	-0.380872	0.0896234	0.235311	1.1888	0
AC215607.3_FG004	9	53952100	unknown	-0.332936	3.7926	0.114195	0.342993	0	1.41503
AC219006.2_FG006	8	131967927	organic anion transporter	-0.534848	3.21364	1.42126	0.345979	1.23621	2.53311
AC234160.1_FG003	8	8304033	bgl01_orysj ame: full=beta-glucosidase 1 short=os1bglu1 flags: precursor	5.68884	-0.498765	0.12247	0.1991	1.25512	0.0231654
GRMZM2G001889	5	109731853	unknown	-1.89541	3.89178	1.22647	0.31331	0.632618	2.4458
GRMZM2G003076	1	8.3827e+07	tobamovirus multiplication protein expressed	0.39804	-3.05358	4.23938	0.697433	4.51699	2.10972
GRMZM2G006047	1	2.87111e+08	lipid transfer protein	5.84054	-0.25974	0.0914278	0.177237	1.12659	0.0453921
GRMZM2G015788	3	8.33828e+06	unknown	4.17444	-0.212718	2.64799	0.630645	5.28058	2.51384
GRMZM2G015818	3	8.34638e+06	unknown	21.4609	0.155452	3.8333	0.894494	23.0299	3.97235
GRMZM2G018946	6	88695732	ob-fold nucleic acid binding domain containing protein	3.47879	-1.63567	2.49801	1.28769	6.97763	0.391775
GRMZM2G024996	9	1.34751e+08	unknown	11.3521	0.144716	0.0739277	0.166109	1.95962	0.0979663
GRMZM2G026095	2	1.86821e+08	unknown	-1.11802	13.2487	0.398143	0.146692	0.234139	2.34161
GRMZM2G031331	2	46440330	seven transmembrane protein mlo8	5.58778	-0.837204	0.490997	0.531382	3.46024	0.046122
GRMZM2G033544	4	1.98542e+06	cyclopropane-fatty-acyl-phospholipid synthase	3.97448	-0.5091	0.353634	0.659001	2.97282	0.0181369
GRMZM2G033962	2	218769589	unknown	4.37279	0.680292	2.2057	1.09719	7.00349	2.95211
GRMZM2G034013	2	1.9506e+08	30s ribosomal protein s31	-0.0542687	-5.05877	21.1693	2.81685	21.0164	6.91944
GRMZM2G036861	9	141938282	chorismate synthase 2	3.44185	-0.441274	1.58023	2.07044	8.70639	0.666594
GRMZM2G036880	4	235825923	chlorophyll a-b binding protein 6a	-0.555052	3.96672	0.855933	0.700981	0.466852	3.63653
GRMZM2G039187	1	253134334	iq calmodulin-binding motif family protein	3.35913	-0.803929	7.40666	2.21442	14.8452	5.62642
GRMZM2G039723	10	122380536	at3g26650 mlj15_5	0.0652521	3.21955	0.732958	0.281198	0.751307	1.63829
GRMZM2G039757	7	168746125	unknown	-0.553364	3.32273	2.30955	0.670868	1.93832	4.53867
GRMZM2G042752	7	12009498	unknown	-1.18508	-4.95785	1.94731	0.297732	1.59447	0.471196
GRMZM2G044132	2	53845249	unknown	3.27354	-0.451519	0.189533	0.419768	1.56366	0
GRMZM2G044472	2	167011404	acyltransferase ( kd)	3.34951	-0.800465	0.258418	0.296976	1.25314	0.0206999
GRMZM2G051790	8	5.17527e+07	tdet1 protein	-1.23172	-6.55716	16.8999	1.90569	14.5526	4.40396
GRMZM2G052100	10	1.16058e+08	unknown	3.93335	-0.457272	0.365782	0.71856	3.19213	0.0372046
GRMZM2G053206	2	2.31987e+08	xylanase inhibitor	5.36201	-0.283578	0.125632	0.322653	1.8557	0.0341348
GRMZM2G057281	7	157569899	chlorophyll a-b binding protein of lhcii type iii	-0.42719	4.00552	57.0721	14.5374	50.8619	115.302
GRMZM2G058681	8	6250128	zinc finger protein	-4.58638	1.73852	36.1092	7.18718	3.14603	48.6043
GRMZM2G058881	3	3.31279e+07	unknown	-0.135714	8.39875	0.097405	0.717723	0	6.12538
GRMZM2G063133	1	262509970	bggp beta-1-3-galactosyl-o-glycosyl-glycoprotein	3.70745	-0.0796215	0.820097	0.279082	1.85478	0.797876
GRMZM2G066049	10	1.08787e+06	agmatine coumaroyltransferase	-0.657717	3.47578	0.518393	0.532918	0.167884	2.3707
GRMZM2G070034	9	1.25364e+08	mads-box protein fdrmads8	-1.56164	4.56007	0.958045	0.383173	0.359667	2.70534
GRMZM2G073114	5	24975171	unknown	5.09586	-0.303494	0.900571	2.67176	14.5155	0.0897068
GRMZM2G075002	2	213167097	cbl-interacting protein kinase 1	4.12329	0.0693424	1.50238	0.481964	3.48966	1.5358
GRMZM2G077361	7	45149510	abc transporter b family member 28	-1.84624	5.0937	0.982215	0.347061	0.341455	2.75004
GRMZM2G077612	5	178090445	hypothetical protein SORBIDRAFT_04g024140 [Sorghum bicolor]	3.04016	-0.86235	0.291245	0.337734	1.31801	0
GRMZM2G079281	2	223495504	unknown	16.9521	0.558878	2.02759	0.393489	8.69805	2.2475
GRMZM2G079805	1	2.16158e+08	at3g23510 mee5_5	-0.0904491	3.08246	0.855487	0.812664	0.781982	3.36049
GRMZM2G082302	2	230886672	unknown	4.01659	0.289739	0.941618	0.295515	2.12858	1.02724
GRMZM2G083855	5	1.78476e+08	unknown	-1.47401	4.5942	0.355796	0.195428	0.0677338	1.25363
GRMZM2G084958	2	1.4622e+06	nadph:protochlorophyllide oxidoreductase a	-1.06825	3.24595	182.773	39.6061	140.464	311.333
GRMZM2G089493	7	1.58127e+08	tapetum-specific protein lla-115	3.72869	-0.0808567	0.901643	1.47434	6.399	0.782433
GRMZM2G089506	9	4.16726e+07	41 kd chloroplast nucleoid dna binding protein	3.37234	-0.149221	0.190442	0.464458	1.75675	0.121135
GRMZM2G090842	9	142644127	act-domain repeat protein 9	3.73992	-1.29265	0.958216	0.187954	1.66115	0.715256
GRMZM2G092474	3	186794030	p21 expressed	4.47756	-0.242535	0.1628	0.526888	2.52197	0.0350117
GRMZM2G092689	3	18319010	unknown	-0.871834	3.63805	2.8948	1.03892	1.98903	6.67446
GRMZM2G094828	9	117680494	hypothetical protein [Zea mays]	-0.734887	3.5735	0.576783	0.78486	0	3.38148
GRMZM2G098622	2	1.66134e+08	unknown	-0.665272	-12.1375	46.4146	2.69376	44.6225	13.719
GRMZM2G099454	1	7.40586e+06	basic endochitinase c precursor	5.32075	0.0693974	11.2033	5.04455	38.0441	11.5534
GRMZM2G099467	1	8.34023e+07	2og-fe oxygenase family expressed	3.07262	-0.277539	0.323197	0.437178	1.66648	0.201863
GRMZM2G101116	1	2.20787e+08	pirin-like protein	3.06678	-0.148326	0.567035	0.271567	1.39987	0.526755
GRMZM2G102356	2	40588684	mlp-like protein 423	-0.571328	3.05952	60.79	15.4227	51.9786	107.976
GRMZM2G103479	8	57452556	unknown	-0.269836	278.092	0.0048479	0.0179661	0	5.00108
GRMZM2G106950	7	82331371	indole-3-glycerol phosphate synthase	-0.653817	3.04986	3.91766	3.9098	1.36136	15.842
GRMZM2G108228	2	2.48096e+07	unknown	-6.36294	0.750655	21.4629	1.98799	8.81344	22.9552
GRMZM2G108284	4	1.73e+08	unknown	3.3554	-1.09649	0.447193	0.16806	1.0111	0.262916
GRMZM2G108514	1	2.43814e+08	tyrosine decarboxylase	4.64003	-0.686417	0.160505	0.198245	1.08037	0.0244255
GRMZM2G108996	5	200111165	brxl2_orysj ame: full=protein brevis radix-like 2 short= 2	-0.982569	3.7146	15.158	2.91633	12.2925	25.991
GRMZM2G109509	1	7.08922e+06	unknown	-3.24973	-0.0823093	8.08503	1.72552	2.47756	7.943
GRMZM2G109959	5	178925201	unknown	11.9539	-0.271617	0.0632551	0.232884	2.84712	0
GRMZM2G110616	1	7569592	unknown	-0.35042	4.15107	0.354909	0.768856	0.085487	3.54648
GRMZM2G111147	6	1.53213e+08	dna binding	136.234	-0.354302	0.00345136	0.00974129	1.33055	0
GRMZM2G111926	8	3.33663e+07	nodulin 3-like protein	3.13696	-0.816217	1.83751	1.87272	7.71217	0.308961
GRMZM2G117942	4	9698408	win2 precursor	5.32222	-0.223451	0.0478872	0.214308	1.18848	0
GRMZM2G117971	4	9680937	win2 precursor	3.45861	-0.247285	0.0810178	0.327629	1.21416	0
GRMZM2G120619	3	2.23355e+08	chlorophyll a-b binding protein 2	-0.0812734	3.0802	0.244088	0.273931	0.221825	1.08785
GRMZM2G122057	8	1.6408e+08	unknown	5.58626	-0.14272	0.177028	1.24039	7.10615	0
GRMZM2G122276	5	1.78944e+08	unknown	4.35528	-0.349027	0.188181	0.539159	2.53637	0
GRMZM2G125095	1	83644399	ac074196_15 dna-binding protein	-0.625119	3.20321	0.423718	0.192233	0.303549	1.03948
GRMZM2G125432	5	201601125	zinc binding motif and set domain-containing protein	3.61655	-1.60171	1.86208	1.14777	6.01305	0.0236812
GRMZM2G125441	9	7.57802e+07	meiosis 5	4.9603	-0.435992	1.5708	3.07304	16.814	0.230983
GRMZM2G126261	7	1.7278e+08	peroxidase poc1	5.50992	-0.437176	0.096849	0.221533	1.31748	0
GRMZM2G137696	4	161437696	growth regulator	0.532208	-5.573	11.7372	1.83031	12.7113	1.5369
GRMZM2G140915	1	62700675	elicitor-inducible cytochrome p450	4.66595	-0.565029	1.1859	0.736854	4.62402	0.769554
GRMZM2G141026	6	1.58689e+08	o-methyltransferase zrp4	3.51376	-0.350541	0.525666	0.393676	1.90895	0.387667
GRMZM2G141432	2	2.15088e+08	histone -like isoform 2	-6.97863	0.209763	186.091	26.6507	0.105105	191.681
GRMZM2G142413	3	9.46146e+06	mar binding filament-like protein 1	-3.02139	1.93722	7.81928	1.0517	4.64169	9.85665
GRMZM2G151510	5	1.26665e+08	unknown	-1.4047	3.67364	0.547143	0.325681	0.0896595	1.74358
GRMZM2G151656	2	197145619	auxin induced protein	3.39133	-0.844925	1.10053	0.673153	3.38342	0.53177
GRMZM2G153208	1	228643879	pr17c precursor	4.64407	-0.322581	1.46386	0.834882	5.34111	1.19454
GRMZM2G154048	3	7.61397e+07	unknown	-0.683846	4.30996	2.44954	0.552702	2.07158	4.83167
GRMZM2G154178	7	4.10541e+07	beta-expansin 4 precursor	3.25403	-0.825327	0.884798	0.626311	2.92283	0.367886
GRMZM2G158205	8	1.5314e+08	gdsl esterase lipase apg	3.07207	-0.360478	0.48781	0.706582	2.65848	0.233103
GRMZM2G158313	5	1.43973e+08	bzip transcription factor rf2b	3.08412	0.485329	0.643991	0.425569	1.9565	0.850532
GRMZM2G159908	3	229309905	protein kinase domain containing expressed	4.0832	1.31999	0.220502	0.262145	1.29089	0.566531
GRMZM2G161306	1	290395611	rubredoxin family protein	3.44421	-0.0320535	0.28224	0.321322	1.38894	0.271941
GRMZM2G162451	9	138764501	fkbp-type peptidyl-prolyl cis-trans	-1.04867	3.29506	4.01945	0.952522	3.02056	7.15806
GRMZM2G170588	5	2.01672e+08	unknown	-5.19734	-1.29993	2.40331	0.462412	0	1.80221
GRMZM2G172297	2	2.23284e+08	helix-loop-helix dna-binding domain containing expressed	4.20718	-0.301729	2.1872	0.659677	4.96258	1.98816
GRMZM2G174240	5	210590156	by genscan and genefinder	-3.17887	2.4201	2.52923	0.315299	1.52693	3.29228
GRMZM2G178641	5	158933953	unknown [Zea mays]	-0.609406	3.06579	0.422504	0.693304	0	2.54803
GRMZM2G179507	10	1.47333e+08	triacylglycerol lipase 2	-0.546285	4.63636	1.48129	0.700698	1.09851	4.72998
GRMZM2G179518	10	1.47329e+08	thiol-disulfide oxudoreductase dcc	0.354151	-3.73516	3.95961	0.764133	4.23023	1.10545
GRMZM2G180244	10	2.05228e+06	unknown	-0.685984	-3.4514	9.17352	2.15346	7.69628	1.74108
GRMZM2G180659	6	6892581	amino acid	4.88977	-0.823759	0.708134	0.332348	2.33324	0.434359
GRMZM2G181415	7	72145733	unknown	-0.836665	3.14769	0.802039	0.238169	0.602771	1.55172
GRMZM2G301853	8	1.54663e+08	unknown	-1.61218	6.32684	0.263082	0.163184	0	1.29552
GRMZM2G306741	2	2.75882e+07	unknown	3.31788	-0.743958	6.78224	2.02435	13.4988	5.27621
GRMZM2G316256	7	1.50772e+07	cytosolic ascorbate peroxidase	9.17785	0.21825	1.39727	0.622193	7.10766	1.53306
GRMZM2G325168	9	2.56848e+07	unknown	4.01672	-0.242917	0.136692	0.56271	2.39694	0
GRMZM2G331533	2	166088379	unknown	-0.10436	-5.81624	35.6897	4.38236	35.2324	10.2009
GRMZM2G339645	7	156287060	cslf3 - cellulose synthase-like family f glucan synthase	4.70365	1.02241	2.64185	1.71838	10.7245	4.39874
GRMZM2G340359	2	2.15012e+08	pleckstrin homology domain-containing	6.69013	-1.72544	3.45819	0.442584	6.41914	2.69454
GRMZM2G349791	4	1295309	o-methyltransferase family expressed	1.49273	6.08768	15.6858	11.5411	32.9135	85.9441
GRMZM2G353114	1	280539457	splicing factor u2af-associated	12.5935	2.06681	0.0840517	0.0785997	1.0739	0.246502
GRMZM2G359298	10	1.03633e+08	at4g12290 t4c9_130	-1.71323	3.46832	1.45082	0.671928	0.299651	3.78128
GRMZM2G375420	2	2.23509e+08	tpr repeat region family expressed	14.904	0.175794	1.96139	0.467868	8.93451	2.04364
GRMZM2G392791	1	1.7999e+08	epoxide hydrolase 2	-0.536312	3.07157	2.54543	1.73746	1.61361	7.88215
GRMZM2G402631	1	1.78009e+08	unknown	4.57268	0.36016	2.21516	1.90362	10.9198	2.90077
GRMZM2G402977	3	3.59657e+07	hypothetical protein [Zea mays]	-1.13142	8.00951	1.5983	0.931206	0.544707	9.0568
GRMZM2G408325	9	3.59592e+07	unknown	-0.76573	4.20157	0.353144	0.356706	0.0800037	1.85187
GRMZM2G409976	1	7.08563e+06	protein kinase apk1b	3.81831	0.0996427	1.95969	3.64861	15.8912	2.32325
GRMZM2G413897	3	2.05888e+07	kda heat shock protein	6.90488	-0.560786	0.148692	0.179206	1.38609	0.048195
GRMZM2G421463	7	1.24567e+08	erwinia induced protein 1	3.37632	0.652486	0.729322	0.417584	2.13922	1.00179
GRMZM2G426213	5	2.01629e+08	hypothetical protein SORBIDRAFT_04g030320 [Sorghum bicolor]	4.55729	-0.368966	1.31993	0.347207	2.90225	1.19182
GRMZM2G428168	3	149313778	glutathione s-transferase	3.06328	-0.392807	0.599443	0.449494	1.97637	0.422879
GRMZM2G429955	3	2.23407e+08	chlorophyll a-b binding protein 2	-0.643659	3.37883	0.328437	0.510266	0	2.05254
GRMZM2G430646	8	92936399	unknown	-1.19124	3.4849	0.324003	0.210109	0.0737126	1.05621
GRMZM2G443439	6	97875385	unknown	4.22993	0.0224859	0.363437	0.216146	1.27772	0.368297
GRMZM2G447795	6	1.29087e+08	class iii chitinase homologue ( hib3h-a)	11.2616	-0.525458	0.0573221	0.10909	1.28585	0
GRMZM2G453805	3	212009876	acidic class iii chitinase hib3a	7.97171	-0.320278	0.143298	0.447419	3.70999	0
GRMZM2G455769	1	296190028	unknown	-3.29783	0.662109	1.51689	0.321524	0.456553	1.72977
GRMZM2G455784	1	142779555	unknown	-1.97468	3.37433	0.504747	0.149485	0.209561	1.00916
GRMZM2G468056	8	170336336	wrky transcription factor 48-like protein	-1.48419	3.37274	0.398633	0.186957	0.121153	1.02919
GRMZM2G473709	2	2.17009e+08	ubiquinol-cytochrome c reductase complex kda protein	-1.22274	3.79688	38.7943	10.2662	26.2414	77.7739
GRMZM2G476810	2	166077248	unknown	-0.135975	-4.04278	31.0245	5.45117	30.2833	8.98663
GRMZM2G479245	9	1.47479e+08	af118114_1 mfp1 attachment factor 1	7.67258	0.023981	1.09208	1.15217	9.93223	1.11971
GRMZM2G510522	7	1.52147e+07	unknown	0.721564	-3.39054	2.42809	0.653519	2.89965	0.212316
GRMZM2G538535	9	4.10536e+07	chloroplast nucleoid dna-binding protein cnd41	3.44366	-0.204661	0.29816	0.412395	1.71831	0.213759
GRMZM2G544469	9	20862021	unknown	-0.273397	829.59	0.0053395	0.0195302	0	16.2074
GRMZM2G581425	1	2.12536e+07	unknown	-0.656771	4.42434	0.833908	0.259632	0.663389	1.98261
GRMZM2G700599	8	1.09938e+08	unknown	-0.972721	6.3448	9.50904	2.3074	7.26459	24.149
GRMZM2G701201	6	154310408	receptor like protein kinase	4.09302	0.050183	0.432315	0.279284	1.57543	0.44633
GRMZM5G806182	2	5.38452e+07	unknown	3.94301	-0.425019	0.159783	0.375943	1.64213	0
GRMZM5G838812	6	160461484	hat family dimerisation domain containing expressed	-0.404425	9.17639	0.141134	0.254253	0.0383073	2.47426
GRMZM5G849473	7	1.32077e+08	unknown	3.11206	-0.0858712	2.68386	1.09794	6.10071	2.58958
GRMZM5G850027	10	7.25808e+07	unknown	3.1759	-0.830322	0.329996	0.397432	1.5922	0
GRMZM5G850888	2	2.22864e+08	unknown	-3.47336	1.12403	2.43081	0.699844	0	3.21745
GRMZM5G851051	7	1.10907e+08	inorganic carbon transport protein	-0.485355	3.35432	0.979986	0.687092	0.646502	3.28471
GRMZM5G854585	10	1.41555e+08	unknown	4.29642	-0.237733	0.240478	1.01155	4.58651	0
GRMZM5G855808	2	217879521	tpr domain containing expressed	-3.0396	0.371565	1.4281	0.26062	0.635921	1.52494
GRMZM5G874201	8	37206798	unknown	-0.619885	3.33536	0.216783	0.349715	0	1.38321
