# Supplementary material for: Mendelian and Non-Mendelian Regulation of Gene Expression in Maize
Source: PLoS Genet. 2013 Jan 17;9(1):e1003202. doi: 10.1371/journal.pgen.1003202 (PMC3547793; doi:10.1371/journal.pgen.1003202)
Supplement: Table S6 — MaizeCyc enrichment of regulated genes at each trans-eQTL hotspot with at least 200 targets. The pathway enrichment of the regulated genes by hotspots was conducted using BiNGO plugin in Cytoscape based on the annotation information from MaizeCyc database. (XLS) [file pgen.1003202.s016.xls]

## Sheet: Sheet1
Table S6. MaizeCyc enrichment of regulated genes at each trans-eQTL hotspot with at least 200 targets. The pathway enrichment of the regulated genes by hotspots was conducted using BiNGO plugin in Cytoscape based on the annotation information from MaizeCyc database.
HotspotName	Pathway ID	Description	Number of genes in input	Number of genes in reference	P-value	Q-value	Gene List
Zm_eQTL_HS35	PWY-5461	betanidin degradation	5	215	0.00057487	0.022655	GRMZM2G131525,GRMZM2G068217,GRMZM2G136158,GRMZM2G104394,GRMZM2G108153
Zm_eQTL_HS37	ANAGLYCOLYSIS-PWY	glycolysis III	5	191	0.0021255	0.038846	GRMZM2G054361,GRMZM2G071630,GRMZM2G068913,GRMZM2G075027,GRMZM2G467069
Zm_eQTL_HS41	CHLOROPHYLL-SYN	chlorophyllide a biosynthesis I	5	51	0.0027464	0.015464	GRMZM2G063048,GRMZM2G043453,GRMZM2G024738,GRMZM2G419806,GRMZM2G032282
Zm_eQTL_HS65	GLYCOLYSIS	glycolysis I	6	189	0.00251	0.034225	GRMZM2G119175,GRMZM2G446253,GRMZM2G059151,GRMZM2G064302,GRMZM2G127591,GRMZM2G306732
Zm_eQTL_HS65	PWY-3781	aerobic respiration -- electron donor II	5	190	0.0029	0.044125	GRMZM2G143651,GRMZM2G105207,GRMZM2G064753,GRMZM5G886688,GRMZM2G004172
Zm_eQTL_HS65	GLUCONEO-PWY	gluconeogenesis I	5	128	0.00201	0.030225	GRMZM2G446253,GRMZM2G077415,GRMZM2G064302,GRMZM2G127591,GRMZM2G306732
Zm_eQTL_HS65	ANAGLYCOLYSIS-PWY	glycolysis III	5	191	0.00291	0.044325	GRMZM2G119175,GRMZM2G446253,GRMZM2G059151,GRMZM2G064302,GRMZM2G127591
Zm_eQTL_HS65	PWY-1042	glycolysis IV (plant cytosol)	5	195	0.00296	0.047325	GRMZM2G119175,GRMZM2G446253,GRMZM2G059151,GRMZM2G064302,GRMZM2G127591
Zm_eQTL_HS95	TRNA-CHARGING-PWY	tRNA charging pathway	5	144	0.00171	0.028225	GRMZM2G019121,GRMZM2G094123,GRMZM2G478664,GRMZM2G082271,GRMZM2G143450
