# Supplementary material for: Mendelian and Non-Mendelian Regulation of Gene Expression in Maize
Source: PLoS Genet. 2013 Jan 17;9(1):e1003202. doi: 10.1371/journal.pgen.1003202 (PMC3547793; doi:10.1371/journal.pgen.1003202)
Supplement: Table S11 — Co-regulated genes at hotspots and genes with cis-eQTL near trans-eQTL hotspots. a refers to trans-eQTL hotspts. b is the gene with cis-eQTL underneath the hotspot; c indicates the number of regulated genes by hotspot; d is the number of shared genes co-expressed with a cis-regulated gene and also found within a hotspot. (XLS) [file pgen.1003202.s021.xls]

## Sheet: Sheet1
Table S11. Co-regulated genes at hotspots and genes with cis-eQTL near trans-eQTL hotspots. a refers to trans-eQTL hotspts. b is the gene with cis-eQTL underneath the hotspot; c indicates the number of regulated genes by hotspot; c is the number of shared genes co-expression with cis-gene and also regulated by hotspot. d is the number of shared genes co-expressed with a cis-regulated gene and als…
HotspotNamea	cis_geneb	# regulated genes_HSc	# co-expressedd	Rate of co-expressed	B73	Mo17	Bias significant	Functional Description
Zm_eQTL_HS1	GRMZM2G091563	93	38	0.408602	37	1	5.22099e-09	mitochondrial processing peptidase
Zm_eQTL_HS1	GRMZM2G107815	93	47	0.505376	45	2	3.55994e-10	heparanase-like protein 2 expressed
Zm_eQTL_HS1	GRMZM2G107854	94	51	0.542553	48	3	2.95235e-10	alpha- -galacturonosyltransferase
Zm_eQTL_HS1	GRMZM2G107872	94	42	0.446809	40	2	4.53136e-09	leucine-rich repeat resistance protein
Zm_eQTL_HS1	GRMZM2G173067	93	50	0.537634	48	2	7.7496e-11	integral membrane family expressed
Zm_eQTL_HS1	GRMZM2G015804	93	45	0.483871	42	3	6.10789e-09	PREDICTED: beta-glucosidase 6-like
Zm_eQTL_HS2	GRMZM2G110023	92	45	0.48913	28	17	0.10105	ATP-dependent Clp protease ATP-binding subunit clpA
Zm_eQTL_HS2	GRMZM2G035552	92	44	0.478261	32	12	0.00256883	act-domain repeat protein 9
Zm_eQTL_HS2	GRMZM2G085427	92	37	0.402174	22	15	0.249818	rrp6-like protein 2
Zm_eQTL_HS2	GRMZM2G102347	91	37	0.406593	23	14	0.138983	receptor expression-enhancing protein 3
Zm_eQTL_HS2	GRMZM2G122543	90	49	0.544444	31	18	0.0632908	poly polymerase catalytic domain containing expressed
Zm_eQTL_HS2	GRMZM2G140549	91	40	0.43956	23	17	0.342782	---NA---
Zm_eQTL_HS2	GRMZM2G152477	92	48	0.521739	31	17	0.0433081	purple acid phosphatase expressed
Zm_eQTL_HS3	GRMZM2G035557	47	22	0.468085	17	5	0.0105152	EF hand family protein
Zm_eQTL_HS3	GRMZM2G060544	49	21	0.428571	19	2	0.000207502	seed specific protein bn15d17a
Zm_eQTL_HS3	GRMZM2G179521	47	20	0.425532	16	4	0.00729036	glucose-6-phosphate dehydrogenase
Zm_eQTL_HS3	GRMZM2G341271	49	29	0.591837	23	6	0.00159499	e3 ubiquitin-protein ligase bre1-like 2
Zm_eQTL_HS3	GRMZM5G892991	47	26	0.553191	20	6	0.00603956	Ragged seedling 2
Zm_eQTL_HS4	GRMZM2G053079	26	13	0.5	5	8	0.405381	hypothetical protein SORBIDRAFT_01g028020 [Sorghum bicolor]
Zm_eQTL_HS4	GRMZM2G057690	27	11	0.407407	6	5	0.763025	chalcone-flavanone isomerase family protein
Zm_eQTL_HS4	GRMZM2G321940	26	13	0.5	5	8	0.405381	imp dehydrogenase gmp
Zm_eQTL_HS4	GRMZM2G457147	22	9	0.409091	3	6	0.317311	methyltransferase domain-containing protein
Zm_eQTL_HS4	GRMZM2G478212	24	10	0.416667	4	6	0.527089	lrgB-like family protein
Zm_eQTL_HS4	GRMZM2G123140	25	12	0.48	6	6	1	OCL4 protein
Zm_eQTL_HS5	GRMZM2G132450	25	12	0.48	3	9	0.0832645	Cytochrome P450 CYP81N5
Zm_eQTL_HS5	GRMZM2G056039	25	10	0.4	1	9	0.011412	Heat shock protein 70 Fragment
Zm_eQTL_HS5	GRMZM2G048140	25	13	0.52	3	10	0.0522036	hypothetical protein SORBIDRAFT_08g019390 [Sorghum bicolor]
Zm_eQTL_HS5	GRMZM2G077757	25	11	0.44	1	10	0.00665561	at3g09850 f8a24_10
Zm_eQTL_HS5	GRMZM2G329655	25	10	0.4	3	7	0.205903	n-terminal domain containing expressed
Zm_eQTL_HS5	GRMZM5G878732	25	14	0.56	2	12	0.00752632	zinc c3hc4 type family protein
Zm_eQTL_HS6	GRMZM2G051168	57	26	0.45614	9	17	0.116665	epidermal patterning factor-like protein
Zm_eQTL_HS6	GRMZM2G094850	58	25	0.431034	8	17	0.0718606	arm repeat-containing protein
Zm_eQTL_HS7	GRMZM2G048616	39	16	0.410256	4	12	0.0455003	2-nitropropane dioxygenase-like protein
Zm_eQTL_HS7	GRMZM2G121937	35	14	0.4	6	8	0.59298	expressed protein [Oryza sativa Japonica Group]
Zm_eQTL_HS7	GRMZM2G169449	38	18	0.473684	5	13	0.0593464	zinc finger protein family-like
Zm_eQTL_HS7	GRMZM2G110143	37	17	0.459459	6	11	0.225253	splicing factor, arginine/serine-rich 2
Zm_eQTL_HS8	GRMZM2G074114	88	36	0.409091	22	14	0.182423	pyridoxamine 5-phosphate oxidase family protein
Zm_eQTL_HS8	GRMZM2G149480	88	44	0.5	27	17	0.131668	mitochondrial energy transfer protein
Zm_eQTL_HS8	GRMZM2G329750	88	48	0.545455	27	21	0.386476	spermidine synthase-related putrescine aminopropyltransferase-related protein
Zm_eQTL_HS8	GRMZM2G449123	88	46	0.522727	26	20	0.376344	pumilio-family rna-binding domain-containing protein
Zm_eQTL_HS8	GRMZM2G337191	87	36	0.413793	21	15	0.317311	KID-containing protein
Zm_eQTL_HS8	GRMZM2G012453	88	43	0.488636	23	20	0.647315	PREDICTED: probable pre-mRNA-splicing factor ATP-dependent RNA helicase-like
Zm_eQTL_HS9	GRMZM2G082630	83	39	0.46988	23	16	0.262332	dna binding protein
Zm_eQTL_HS9	GRMZM2G422373	83	41	0.493976	26	15	0.0858128	serk2 protein
Zm_eQTL_HS9	GRMZM2G457309	82	33	0.402439	16	17	0.861804	mucin-2 precursor
Zm_eQTL_HS9	GRMZM2G436593	83	45	0.542169	25	20	0.456057	mitochondrial 2-oxoglutarate/malate carrier protein
Zm_eQTL_HS10	GRMZM2G048276	31	14	0.451613	9	5	0.28505	partial
Zm_eQTL_HS10	GRMZM2G389567	31	15	0.483871	8	7	0.796253	hypothetical protein SORBIDRAFT_07g021900 [Sorghum bicolor]
Zm_eQTL_HS11	AC217050.4_FG006	30	15	0.5	15	0	0.000107511	14-3-3-like protein
Zm_eQTL_HS11	AC217050.4_FG004	34	15	0.441176	13	2	0.0045087	dna binding protin
Zm_eQTL_HS11	GRMZM2G058702	26	13	0.5	13	0	0.000311491	dihydrolipoamide acetyltransferase
Zm_eQTL_HS11	GRMZM2G107276	34	16	0.470588	15	1	0.000465258	dna-binding protein (transcription factor activity)
Zm_eQTL_HS12	GRMZM2G011588	39	16	0.410256	12	4	0.0455003	BEL1-related homeotic protein 30
Zm_eQTL_HS12	GRMZM2G056303	39	18	0.461538	11	7	0.345779	n-terminal domain containing expressed
Zm_eQTL_HS12	GRMZM2G116840	40	16	0.4	10	6	0.317311	ubiquitin-conjugating enzyme 16
Zm_eQTL_HS12	GRMZM2G163761	40	24	0.6	14	10	0.414216	knotted interacting protein1
Zm_eQTL_HS12	GRMZM2G018414	40	18	0.45	10	8	0.637352	putative growth-regulating factor 13
Zm_eQTL_HS13	GRMZM2G028500	29	13	0.448276	10	3	0.0522036	hypothetical protein [Zea mays]
Zm_eQTL_HS13	GRMZM2G078416	28	12	0.428571	10	2	0.0209213	pentatricopeptide repeat-containing
Zm_eQTL_HS13	GRMZM2G088162	28	12	0.428571	9	3	0.0832645	will die slowly expressed
Zm_eQTL_HS13	GRMZM2G092198	28	14	0.5	12	2	0.00752632	pentatricopeptide repeat-containing protein
Zm_eQTL_HS13	GRMZM2G133749	22	9	0.409091	8	1	0.0196307	guanine nucleotide-binding protein
Zm_eQTL_HS13	GRMZM2G176735	28	13	0.464286	11	2	0.0125549	vam6 vps39-like protein
Zm_eQTL_HS13	GRMZM2G443453	28	14	0.5	11	3	0.0325094	like phosphatidylinositol transfer-like protein
Zm_eQTL_HS13	GRMZM2G180246	22	10	0.454545	8	2	0.0577796	putative GRF-interacting factor 1
Zm_eQTL_HS13	GRMZM2G177974	28	12	0.428571	10	2	0.0209213	transcriptional adaptor
Zm_eQTL_HS13	GRMZM2G153292	28	17	0.607143	15	2	0.00161622	Tubulin alpha-1 chain (Alpha-1-tubulin)
Zm_eQTL_HS14	GRMZM2G034840	353	172	0.487252	141	31	4.96921e-17	auxin response factor 4
Zm_eQTL_HS14	AC210003.2_FG015	353	146	0.413598	117	29	3.26642e-13	Putative uncharacterized protein
Zm_eQTL_HS14	GRMZM2G071333	353	148	0.419263	123	25	7.9122e-16	leucyl-trna synthetase
Zm_eQTL_HS14	GRMZM2G081886	353	147	0.416431	115	32	7.60897e-12	d-3-phosphoglycerate dehydrogenase
Zm_eQTL_HS14	GRMZM2G086920	353	195	0.552408	158	37	4.51553e-18	zim motif family protein
Zm_eQTL_HS14	GRMZM2G324669	353	164	0.464589	135	29	1.26095e-16	molybdopterin biosynthesis
Zm_eQTL_HS14	GRMZM2G531230	353	196	0.555241	162	34	6.08237e-20	aspg2_arath ame: full=probable isoaspartyl peptidase l-asparaginase 2 ame: full=l-asparagine amidohydrolase 2 contains: ame: full=isoaspartyl peptidase l-asparaginase 2 subunit alpha contains: ame: full=isoaspartyl peptidase l-asparaginase 2 subunit beta flags: precursor
Zm_eQTL_HS14	GRMZM2G119941	353	152	0.430595	122	30	8.5099e-14	invertase cell wall4 (incw4), mRNA
Zm_eQTL_HS14	GRMZM2G040095	353	169	0.478754	140	29	1.36021e-17	lipoxygenase6
Zm_eQTL_HS14	GRMZM2G036297	351	150	0.42735	128	22	4.93501e-18	Protein LIGULELESS 1
Zm_eQTL_HS14	GRMZM2G035325	353	178	0.504249	152	26	3.58474e-21	SWIB/MDM2 domain-containing protein
Zm_eQTL_HS15	GRMZM2G026050	45	22	0.488889	6	16	0.0330063	EREBP-4 like protein
Zm_eQTL_HS15	GRMZM2G139463	45	21	0.466667	8	13	0.275234	isoaspartyl peptidase l-asparaginase 3 subunit beta
Zm_eQTL_HS16	GRMZM2G161932	23	13	0.565217	11	2	0.0125549	unknown [Zea mays]
Zm_eQTL_HS16	GRMZM2G323844	26	11	0.423077	9	2	0.0348085	pleckstrin homology domain-containing protein
Zm_eQTL_HS16	GRMZM2G368698	26	12	0.461538	9	3	0.0832645	c vif2
Zm_eQTL_HS17	GRMZM2G122239	38	18	0.473684	13	5	0.0593464	cysteine-type peptidase
Zm_eQTL_HS17	GRMZM2G165063	41	18	0.439024	12	6	0.157299	inhibitor of apoptosis-like protein
Zm_eQTL_HS18	GRMZM2G123940	25	13	0.52	12	1	0.00228194	serine carboxypeptidase-like 45
Zm_eQTL_HS18	GRMZM2G170612	23	11	0.478261	10	1	0.00665561	apoptosis-inducing taf9-like domain 1 family
Zm_eQTL_HS18	GRMZM2G556667	23	12	0.521739	12	0	0.000532006	---NA---
Zm_eQTL_HS19	GRMZM2G133421	51	21	0.411765	6	15	0.0495346	lipid transporter
Zm_eQTL_HS19	GRMZM2G352428	49	20	0.408163	7	13	0.179713	hypothetical protein [Zea mays]
Zm_eQTL_HS19	GRMZM2G388018	51	30	0.588235	12	18	0.273322	hypothetical protein SORBIDRAFT_02g033780 [Sorghum bicolor]
Zm_eQTL_HS19	GRMZM2G400173	51	26	0.509804	8	18	0.0498602	anthranilate phosphoribosyltransferase
Zm_eQTL_HS19	GRMZM2G097089	49	22	0.44898	9	13	0.393769	protein binding protein (LOC100284836), mRNA
Zm_eQTL_HS20	GRMZM2G168706	261	107	0.409962	59	48	0.287596	calcium-dependent protein kinase
Zm_eQTL_HS20	GRMZM2G060011	262	133	0.507634	72	61	0.340174	chalcone isomerase
Zm_eQTL_HS20	GRMZM2G060114	261	137	0.524904	80	57	0.0494116	mitochondrial transcription termination factor-like
Zm_eQTL_HS20	GRMZM2G063263	263	108	0.410646	63	45	0.0832645	pentatricopeptide repeat-containing protein
Zm_eQTL_HS20	GRMZM2G135111	261	109	0.417625	73	36	0.000394169	asparaginyl-trna synthetase
Zm_eQTL_HS20	GRMZM2G142932	261	118	0.452107	67	51	0.140773	dna binding protein
Zm_eQTL_HS20	GRMZM2G154864	261	151	0.578544	92	59	0.0072421	transducin family protein
Zm_eQTL_HS20	GRMZM2G169539	261	119	0.455939	64	55	0.409355	mate efflux family expressed
Zm_eQTL_HS20	GRMZM2G171707	261	126	0.482759	78	48	0.00752632	aconitate hydratase
Zm_eQTL_HS20	GRMZM2G171745	261	108	0.413793	71	37	0.00106921	cop9 signalosome complex subunit 7
Zm_eQTL_HS20	GRMZM2G371695	261	151	0.578544	84	67	0.16653	protein grip
Zm_eQTL_HS20	GRMZM2G470075	261	114	0.436782	69	45	0.0245886	transparent testa 12 protein
Zm_eQTL_HS20	GRMZM5G821027	261	120	0.45977	67	53	0.201243	60s ribosomal protein l24
Zm_eQTL_HS20	GRMZM2G002879	261	117	0.448276	62	55	0.517535	methionine aminopeptidase 1B
Zm_eQTL_HS20	GRMZM2G418415	261	114	0.436782	70	44	0.0148867	putative lysophospholipase homolog
Zm_eQTL_HS20	GRMZM2G099167	261	131	0.501916	75	56	0.0969069	Tubulin alpha-5 chain (Alpha-5-tubulin)
Zm_eQTL_HS21	GRMZM2G099239	40	18	0.45	13	5	0.0593464	remorin-like protein
Zm_eQTL_HS21	GRMZM2G113370	40	16	0.4	15	1	0.000465258	unknown [Zea mays]
Zm_eQTL_HS21	GRMZM2G121458	41	24	0.585366	16	8	0.10247	major facilitator protein
Zm_eQTL_HS21	GRMZM2G007060	40	16	0.4	13	3	0.0124193	interferon-related developmental regulator family protein
Zm_eQTL_HS21	GRMZM2G130773	41	21	0.512195	14	7	0.12663	mTERF family protein (LOC100285943), mRNA
Zm_eQTL_HS21	GRMZM2G022242	41	18	0.439024	13	5	0.0593464	putative Flavonol 3-O-glucosyltransferase
Zm_eQTL_HS22	GRMZM2G046011	92	37	0.402174	25	12	0.0325828	60s ribosomal protein l38
Zm_eQTL_HS22	GRMZM2G105302	88	37	0.420455	27	10	0.00519346	zinc finger protein sdr4
Zm_eQTL_HS22	GRMZM2G115817	89	45	0.505618	34	11	0.000606619	circadian clock coupling factor zgt
Zm_eQTL_HS22	GRMZM2G121868	90	49	0.544444	36	13	0.00101724	---NA---
Zm_eQTL_HS22	GRMZM2G125501	91	40	0.43956	29	11	0.00442653	gras family transcription factor
Zm_eQTL_HS22	GRMZM2G146416	89	48	0.539326	34	14	0.00389242	myosin heavy chain-like protein
Zm_eQTL_HS22	GRMZM2G019060	89	44	0.494382	31	13	0.00665561	Protein SHORT-ROOT 1
Zm_eQTL_HS23	GRMZM5G840582	54	30	0.555556	25	5	0.00026073	alanine aminotransferase 2
Zm_eQTL_HS23	GRMZM2G143602	54	22	0.407407	20	2	0.000124236	Casein kinase II subunit alpha (EC 2.7.11.1)(CK2-alpha)(CK II)
Zm_eQTL_HS23	GRMZM2G345270	50	20	0.4	19	1	5.69941e-05	hypothetical protein SORBIDRAFT_02g002310 [Sorghum bicolor]
Zm_eQTL_HS23	GRMZM2G034572	54	23	0.425926	19	4	0.0017617	putative phytosulfokine receptor
Zm_eQTL_HS23	GRMZM5G850015	54	28	0.518519	23	5	0.000669729	pyridoxin biosynthesis protein ER1
Zm_eQTL_HS24	GRMZM2G068217	49	22	0.44898	12	10	0.669815	Ethylene insensitive 2
Zm_eQTL_HS24	GRMZM2G097959	49	21	0.428571	9	12	0.512691	at5g62650 mrg21_7
Zm_eQTL_HS24	GRMZM2G153181	50	20	0.4	8	12	0.371093	rna polymerase i-associated factor paf67
Zm_eQTL_HS24	GRMZM2G159307	49	30	0.612245	14	16	0.715001	atp binding
Zm_eQTL_HS24	GRMZM2G169973	49	26	0.530612	10	16	0.239317	ovate protein
Zm_eQTL_HS24	GRMZM2G470307	49	25	0.510204	10	15	0.317311	myb-like dna-binding domain containing expressed
Zm_eQTL_HS25	GRMZM2G068322	228	118	0.517544	60	58	0.853923	harpin-induced protein (LOC100286305), mRNA
Zm_eQTL_HS25	GRMZM2G022651	228	105	0.460526	56	49	0.494525	hypothetical protein OsJ_00775 [Oryza sativa Japonica Group]
Zm_eQTL_HS25	GRMZM2G068352	228	117	0.513158	55	62	0.517535	density-regulated protein
Zm_eQTL_HS25	GRMZM2G133121	221	92	0.41629	48	44	0.676657	phosphoribosylaminoimidazole carboxylase
Zm_eQTL_HS25	GRMZM2G143165	228	115	0.504386	58	57	0.925705	nucleotide pyrophosphatase-like protein
Zm_eQTL_HS26	GRMZM2G047815	53	23	0.433962	6	17	0.0218101	hypothetical protein [Zea mays]
Zm_eQTL_HS26	GRMZM2G102714	53	22	0.415094	6	16	0.0330063	nuclease (LOC100281257), mRNA
Zm_eQTL_HS27	GRMZM2G011541	87	43	0.494253	10	33	0.000452394	hypothetical protein SORBIDRAFT_03g038490 [Sorghum bicolor]
Zm_eQTL_HS27	GRMZM2G027478	88	36	0.409091	12	24	0.0455003	hypothetical protein [Zea mays]
Zm_eQTL_HS27	GRMZM2G099080	87	44	0.505747	11	33	0.000911119	px domain containing protein
Zm_eQTL_HS27	GRMZM2G105307	87	48	0.551724	11	37	0.000174887	hit-type zinc finger protein
Zm_eQTL_HS27	GRMZM2G118363	86	36	0.418605	9	27	0.0026998	vhs2 protein
Zm_eQTL_HS27	GRMZM2G310368	87	46	0.528736	10	36	0.000126337	ethylene-responsive transcription factor 4
Zm_eQTL_HS28	GRMZM2G118369	33	15	0.454545	6	9	0.438578	unknown [Zea mays]
Zm_eQTL_HS28	GRMZM2G033671	31	15	0.483871	6	9	0.438578	membrane-bound transcription factor site-2 protease-like
Zm_eQTL_HS28	GRMZM2G330302	34	16	0.470588	7	9	0.617075	Putative CTP synthase Fragment
Zm_eQTL_HS29	GRMZM2G121878	336	139	0.41369	35	104	4.84228e-09	carbonic anhydrase
Zm_eQTL_HS29	GRMZM2G037322	334	163	0.488024	42	121	6.10261e-10	catalytic/ hydrolase
Zm_eQTL_HS29	GRMZM2G370745	336	187	0.556548	47	140	1.04016e-11	cytochrome P450 10
Zm_eQTL_HS29	GRMZM5G827365	336	138	0.410714	35	103	7.0999e-09	F-box domain containing protein
Zm_eQTL_HS29	GRMZM2G000593	336	139	0.41369	35	104	4.84228e-09	transparent testa 12 protein
Zm_eQTL_HS29	GRMZM2G047695	336	162	0.482143	45	117	1.54173e-08	rubisco methyltransferase family protein
Zm_eQTL_HS29	GRMZM2G089525	328	137	0.417683	31	106	1.47748e-10	heat shock transcription factor 8
Zm_eQTL_HS29	GRMZM2G125193	336	186	0.553571	47	139	1.5222e-11	adenylate kinase expressed
Zm_eQTL_HS29	GRMZM2G153672	336	143	0.425595	39	104	5.46206e-08	triacylglycerol lipase
Zm_eQTL_HS29	GRMZM2G160151	336	156	0.464286	42	114	8.18452e-09	feg protein
Zm_eQTL_HS29	GRMZM2G166987	333	136	0.408408	33	103	1.94362e-09	esterase precursor
Zm_eQTL_HS29	GRMZM2G480686	336	136	0.404762	36	100	4.06614e-08	---NA---
Zm_eQTL_HS29	GRMZM2G037431	336	170	0.505952	43	127	1.17517e-10	polygalacturonase
Zm_eQTL_HS29	GRMZM2G041015	336	142	0.422619	39	103	7.84052e-08	protein ABIL1
Zm_eQTL_HS30	GRMZM2G368491	30	12	0.4	8	4	0.248213	common plant regulatory factor 7
Zm_eQTL_HS30	GRMZM2G061681	30	12	0.4	7	5	0.563703	kinase family protein
Zm_eQTL_HS30	GRMZM2G070890	31	15	0.483871	12	3	0.0201368	hypothetical protein [Zea mays]
Zm_eQTL_HS30	GRMZM2G093032	29	12	0.413793	8	4	0.248213	c13 endopeptidase np1 precursor
Zm_eQTL_HS30	GRMZM2G093098	31	18	0.580645	12	6	0.157299	pentatricopeptide repeat-containing protein
Zm_eQTL_HS30	GRMZM2G174335	30	14	0.466667	11	3	0.0325094	hypothetical protein [Zea mays]
Zm_eQTL_HS30	GRMZM5G890163	29	15	0.517241	11	4	0.0707012	tudor pwwp mbt superfamily protein
Zm_eQTL_HS30	GRMZM2G017086	31	14	0.451613	8	6	0.59298	ubiquitin carboxyl-terminal hydrolase 6
Zm_eQTL_HS30	GRMZM2G030596	29	12	0.413793	8	4	0.248213	zinc finger protein
Zm_eQTL_HS31	GRMZM2G085661	74	31	0.418919	17	14	0.590014	Cytochrome P450 71C4 (EC 1.14.-.-)(Protein benzoxazineless 2)
Zm_eQTL_HS31	GRMZM2G126453	74	39	0.527027	25	14	0.0781691	katanin p60 atpase-containing subunit
Zm_eQTL_HS31	GRMZM2G126552	74	39	0.527027	24	15	0.149541	wd repeat-containing protein 61-like isoform 2
Zm_eQTL_HS31	GRMZM2G146192	74	36	0.486486	21	15	0.317311	periplasmic beta-glucosidase
Zm_eQTL_HS31	GRMZM2G020508	74	34	0.459459	21	13	0.170067	PREDICTED: LOW QUALITY PROTEIN: cell number regulator 13-like
Zm_eQTL_HS32	GRMZM2G045753	34	15	0.441176	3	12	0.0201368	glycerophosphoryl diester
Zm_eQTL_HS32	GRMZM2G068331	35	16	0.457143	5	11	0.133614	phd-finger family expressed
Zm_eQTL_HS33	GRMZM2G013546	62	30	0.483871	26	4	5.90358e-05	cytochrome b6
Zm_eQTL_HS33	GRMZM2G149108	63	36	0.571429	30	6	6.33425e-05	ubiquitin activating enzyme
Zm_eQTL_HS33	GRMZM2G150691	63	35	0.555556	24	11	0.0279918	hypothetical protein [Zea mays]
Zm_eQTL_HS33	GRMZM2G315264	63	32	0.507937	25	7	0.00146272	calmodulin-binding protein
Zm_eQTL_HS33	GRMZM2G079559	63	27	0.428571	23	4	0.000255631	octicosapeptide/Phox/Bem1p
Zm_eQTL_HS34	GRMZM2G146862	41	18	0.439024	1	17	0.000162441	tetratricopeptide repeat -containing protein
Zm_eQTL_HS34	GRMZM2G319062	47	22	0.468085	3	19	0.000646749	polyphenol oxidase
Zm_eQTL_HS34	GRMZM2G543629	44	18	0.409091	1	17	0.000162441	RNA polymerase sigma factor 2 Fragment
Zm_eQTL_HS35	GRMZM2G106795	379	191	0.503958	161	30	2.57157e-21	ADP-ribosylation factor
Zm_eQTL_HS35	GRMZM2G091069	379	187	0.493404	160	27	2.33775e-22	ubiquitin carboxyl-terminal hydrolase
Zm_eQTL_HS35	GRMZM2G110192	379	167	0.440633	144	23	7.73128e-21	neoxanthin cleavage enzyme-like protein
Zm_eQTL_HS35	GRMZM2G125259	378	181	0.478836	153	28	1.52592e-20	hypothetical protein [Zea mays]
Zm_eQTL_HS35	GRMZM2G015875	379	156	0.411609	129	27	3.17371e-16	putative nuclear matrix constituent protein 1
Zm_eQTL_HS36	GRMZM2G108147	156	64	0.410256	31	33	0.802587	dna-binding protein phosphatase 2c
Zm_eQTL_HS36	GRMZM2G108284	156	81	0.519231	38	43	0.578515	protein chup1
Zm_eQTL_HS36	GRMZM2G155490	156	80	0.512821	37	43	0.502335	---NA---
Zm_eQTL_HS36	GRMZM2G108364	156	82	0.525641	40	42	0.825199	PAP-specific phosphatase
Zm_eQTL_HS36	GRMZM2G108712	156	63	0.403846	29	34	0.528733	proliferating cell nuclear antigen2
Zm_eQTL_HS36	GRMZM2G010491	148	73	0.493243	36	37	0.906827	thioredoxin H-type 5
Zm_eQTL_HS37	GRMZM2G041699	420	213	0.507143	132	81	0.000475017	cytokinin-O-glucosyltransferase 2
Zm_eQTL_HS37	GRMZM2G006297	420	175	0.416667	114	61	6.16451e-05	DENN (AEX-3) domain-containing protein-like
Zm_eQTL_HS37	GRMZM2G041809	420	184	0.438095	118	66	0.000126337	hypothetical protein SORBIDRAFT_04g027900 [Sorghum bicolor]
Zm_eQTL_HS37	GRMZM2G149422	419	177	0.422434	119	58	4.53898e-06	phi-1-like phosphate-induced protein
Zm_eQTL_HS37	GRMZM2G169617	420	227	0.540476	144	83	5.15002e-05	rna-binding region-containing protein 1
Zm_eQTL_HS37	GRMZM2G025470	419	215	0.513126	138	77	3.18017e-05	putative NTGP5
Zm_eQTL_HS37	GRMZM2G161566	419	177	0.422434	116	61	3.56421e-05	shikimate kinase
Zm_eQTL_HS37	GRMZM2G441144	419	183	0.436754	118	65	8.93338e-05	thioredoxin-like 5
Zm_eQTL_HS37	GRMZM2G075074	420	200	0.47619	125	75	0.000406952	threonine endopeptidase
Zm_eQTL_HS38	GRMZM2G077299	78	36	0.461538	23	13	0.0955807	alpha-N-arabinofuranosidase A
Zm_eQTL_HS38	GRMZM2G111632	76	32	0.421053	23	9	0.0133283	phosphatidate cytidylyltransferase family expressed
Zm_eQTL_HS38	GRMZM2G179737	78	39	0.5	26	13	0.037373	hypothetical protein [Zea mays]
Zm_eQTL_HS38	GRMZM2G346113	78	42	0.538462	26	16	0.122823	nucleic acid binding protein
Zm_eQTL_HS39	GRMZM2G059381	65	28	0.430769	4	24	0.000157052	AMP-binding protein
Zm_eQTL_HS39	GRMZM2G142344	66	37	0.560606	6	31	3.95703e-05	snare associated golgi protein family
Zm_eQTL_HS39	GRMZM2G153150	65	36	0.553846	8	28	0.000858121	Retinoblastoma-related protein 2 (ZmRBR2)
Zm_eQTL_HS39	GRMZM2G013128	66	31	0.469697	4	27	3.61311e-05	transposon protein, putative, mutator sub-class
Zm_eQTL_HS39	GRMZM5G855894	65	33	0.507692	6	27	0.00025655	zinc knuckle family protein
Zm_eQTL_HS40	GRMZM2G048733	30	13	0.433333	1	12	0.00228194	bet v i allergen-like
Zm_eQTL_HS40	GRMZM2G053934	26	12	0.461538	0	12	0.000532006	ankyrin repeat domain-containing protein
Zm_eQTL_HS40	GRMZM2G125239	28	12	0.428571	0	12	0.000532006	neurofilament triplet m protein
Zm_eQTL_HS40	GRMZM2G174598	26	14	0.538462	0	14	0.000182811	polygalacturonase
Zm_eQTL_HS41	GRMZM2G065494	259	132	0.509653	125	7	9.56263e-25	cycloartenol synthase
Zm_eQTL_HS41	GRMZM2G087226	259	134	0.517375	124	10	6.98519e-23	pentatricopeptide repeat-containing protein
Zm_eQTL_HS41	GRMZM2G101872	258	106	0.410853	102	4	1.75525e-21	phytocyanin pup2
Zm_eQTL_HS41	GRMZM2G117441	259	129	0.498069	121	8	2.54486e-23	dna rna-binding protein kin17-like isoform 2
Zm_eQTL_HS41	GRMZM2G168629	256	106	0.414062	97	9	1.25984e-17	cullin-associated nedd8-dissociated protein 1
Zm_eQTL_HS41	GRMZM2G351747	255	116	0.454902	110	6	4.62901e-22	unknown [Zea mays]
Zm_eQTL_HS41	GRMZM2G467682	259	149	0.57529	138	11	2.37127e-25	hypothetical protein [Zea mays]
Zm_eQTL_HS41	GRMZM2G003157	259	116	0.447876	110	6	4.62901e-22	Translation factor GUF1 homolog
Zm_eQTL_HS42	GRMZM2G006234	90	44	0.488889	40	4	5.72436e-08	ATP binding protein
Zm_eQTL_HS42	GRMZM2G069486	89	36	0.404494	31	5	1.46868e-05	bam8_arath ame: full=beta-amylase 8 ame: full= -alpha-d-glucan maltohydrolase ame: full=beta-amylase 2
Zm_eQTL_HS42	GRMZM2G073571	90	45	0.5	41	4	3.47524e-08	like phosphatidylinositol transfer protein
Zm_eQTL_HS42	GRMZM2G073731	90	48	0.533333	44	4	7.76404e-09	---NA---
Zm_eQTL_HS42	GRMZM2G074015	90	39	0.433333	34	5	3.42197e-06	mevalonate kinase
Zm_eQTL_HS42	GRMZM2G150337	90	47	0.522222	42	5	6.77626e-08	glutamate-gated kainate-type ion channel receptor subunit 5
Zm_eQTL_HS42	GRMZM2G025127	91	37	0.406593	34	3	3.46231e-07	serine/threonine-protein kinase Cx32
Zm_eQTL_HS43	AC213463.3_FG009	120	54	0.45	46	8	2.32664e-07	auxin-regulated protein
Zm_eQTL_HS43	GRMZM2G024973	120	48	0.4	42	6	2.03455e-07	Dwarf plant9 Fragment
Zm_eQTL_HS43	GRMZM2G452026	120	51	0.425	40	11	4.89023e-05	eukaryotic peptide chain release factor subunit 1-1
Zm_eQTL_HS43	GRMZM2G076276	120	48	0.4	40	8	3.85962e-06	glycosyl transferase family 8
Zm_eQTL_HS43	GRMZM2G089974	120	60	0.5	52	8	1.34399e-08	unknown [Zea mays]
Zm_eQTL_HS43	GRMZM2G090172	120	67	0.558333	58	9	2.14665e-09	ubiquitin-conjugating enzyme e2 variant 1
Zm_eQTL_HS43	GRMZM2G090190	120	52	0.433333	42	10	9.09668e-06	zinc finger (ran-binding) domain-containing protein
Zm_eQTL_HS43	GRMZM2G102616	120	62	0.516667	53	9	2.29692e-08	cox viia-like protein
Zm_eQTL_HS43	GRMZM2G177885	120	58	0.483333	50	8	3.49038e-08	zn-finger in ran binding protein and others containing expressed
Zm_eQTL_HS43	GRMZM2G181000	120	77	0.641667	64	13	6.17348e-09	lysophospholipase homolog
Zm_eQTL_HS43	GRMZM2G327260	120	49	0.408333	41	8	2.4256e-06	hypothetical protein [Zea mays]
Zm_eQTL_HS43	GRMZM5G875999	120	49	0.408333	42	7	5.73303e-07	---NA---
Zm_eQTL_HS44	GRMZM5G895064	137	58	0.423358	50	8	3.49038e-08	DNA-directed RNA polymerase (EC 2.7.7.6)
Zm_eQTL_HS44	GRMZM2G134957	132	53	0.401515	47	6	1.78356e-08	electron transporter/ thiol-disulfide exchange intermediate
Zm_eQTL_HS44	GRMZM2G074124	136	60	0.441176	53	7	2.87511e-09	protein yabby 2-like isoform 2
Zm_eQTL_HS44	GRMZM2G377194	135	54	0.4	50	4	3.85454e-10	n-terminal domain containing expressed
Zm_eQTL_HS44	GRMZM5G838285	130	68	0.523077	61	7	5.81327e-11	viviparous- expressed
Zm_eQTL_HS44	GRMZM5G861357	136	75	0.551471	64	11	9.36265e-10	thioesterase family protein
Zm_eQTL_HS45	GRMZM2G074898	46	20	0.434783	12	8	0.371093	60S ribosomal protein L24
Zm_eQTL_HS45	GRMZM2G044900	44	18	0.409091	11	7	0.345779	seed maturation protein expressed
Zm_eQTL_HS45	GRMZM2G045192	46	22	0.478261	16	6	0.0330063	dsba oxidoreductase family protein
Zm_eQTL_HS45	GRMZM2G062470	48	21	0.4375	15	6	0.0495346	sterol-regulatory element binding protein site 2 protease
Zm_eQTL_HS45	GRMZM2G067306	44	18	0.409091	10	8	0.637352	5s rrna binding protein
Zm_eQTL_HS45	GRMZM2G333140	48	29	0.604167	19	10	0.0946707	zinc knuckle containing protein
Zm_eQTL_HS45	GRMZM2G362631	48	26	0.541667	14	12	0.694887	---NA---
Zm_eQTL_HS45	GRMZM2G363437	45	18	0.4	10	8	0.637352	g2 mitotic-specific cyclin c13- expressed
Zm_eQTL_HS46	GRMZM2G002859	95	46	0.484211	34	12	0.00117978	clathrin binding protein
Zm_eQTL_HS46	GRMZM2G037926	95	38	0.4	31	7	9.8884e-05	cyclin-dependent kinase inhibitor 1
Zm_eQTL_HS46	GRMZM2G073017	94	38	0.404255	30	8	0.000358523	pentatricopeptide repeat-containing protein
Zm_eQTL_HS46	GRMZM2G100158	95	48	0.505263	36	12	0.000532006	cytochrome p450 expressed
Zm_eQTL_HS46	GRMZM2G113135	95	52	0.547368	40	12	0.000103217	auxin-responsive family protein
Zm_eQTL_HS46	GRMZM2G138245	94	43	0.457447	34	9	0.000137588	cdpk-related protein expressed
Zm_eQTL_HS46	GRMZM2G166719	95	51	0.536842	40	11	4.89023e-05	protein kinase domain containing expressed
Zm_eQTL_HS47	GRMZM2G079343	26	12	0.461538	3	9	0.0832645	ring u-box domain-containing protein
Zm_eQTL_HS47	GRMZM2G159399	26	13	0.5	5	8	0.405381	auxin response factor 10
Zm_eQTL_HS47	GRMZM5G864239	25	10	0.4	2	8	0.0577796	---NA---
Zm_eQTL_HS47	GRMZM2G048363	26	11	0.423077	3	8	0.131668	inorganic phosphate cotransporter
Zm_eQTL_HS47	GRMZM2G039542	26	13	0.5	3	10	0.0522036	succinate dehydrogenase subunit 3
Zm_eQTL_HS48	GRMZM2G074804	25	13	0.52	10	3	0.0522036	ac115686_10 hnh endonuclease
Zm_eQTL_HS48	GRMZM2G075077	24	10	0.416667	5	5	1	unknown [Zea mays]
Zm_eQTL_HS48	GRMZM2G075150	24	11	0.458333	7	4	0.365712	exocyst complex component expressed
Zm_eQTL_HS48	GRMZM2G137694	25	12	0.48	8	4	0.248213	fatty acid elongase
Zm_eQTL_HS48	GRMZM2G464011	24	10	0.416667	6	4	0.527089	---NA---
Zm_eQTL_HS49	GRMZM2G035405	102	47	0.460784	44	3	2.22502e-09	auxin response factor 18
Zm_eQTL_HS49	GRMZM2G158252	102	45	0.441176	42	3	6.10789e-09	histidine kinase 3
Zm_eQTL_HS49	GRMZM2G083453	102	42	0.411765	39	3	2.77738e-08	unknown [Zea mays]
Zm_eQTL_HS49	GRMZM2G138583	102	50	0.490196	46	4	2.85549e-09	brain protein 16
Zm_eQTL_HS49	GRMZM2G152853	102	54	0.529412	51	3	6.4909e-11	unknown [Zea mays]
Zm_eQTL_HS49	GRMZM2G587543	102	52	0.509804	49	3	1.78187e-10	---NA---
Zm_eQTL_HS50	GRMZM2G017933	72	34	0.472222	27	7	0.000603644	F-box family protein-like
Zm_eQTL_HS50	GRMZM2G111760	72	39	0.541667	30	9	0.000771866	gt-2 factor
Zm_eQTL_HS50	GRMZM2G112895	72	39	0.541667	31	8	0.000230553	hypothetical protein SORBIDRAFT_10g031250 [Sorghum bicolor]
Zm_eQTL_HS50	GRMZM2G128938	72	36	0.5	28	8	0.000858121	serine threonine-protein kinase
Zm_eQTL_HS50	GRMZM2G028108	72	31	0.430556	23	8	0.00705833	pentatricopeptide repeat-containing protein
Zm_eQTL_HS51	GRMZM2G057000	26	12	0.461538	12	0	0.000532006	brassinosteroid biosynthesis-like protein
Zm_eQTL_HS51	GRMZM2G042245	24	13	0.541667	12	1	0.00228194	at5g39790 mkm21_80
Zm_eQTL_HS51	GRMZM2G055682	26	11	0.423077	11	0	0.000911119	coiled-coil domain-containing protein 12
Zm_eQTL_HS51	GRMZM2G472346	26	15	0.576923	15	0	0.000107511	iq calmodulin-binding motif family protein
Zm_eQTL_HS51	GRMZM2G063897	26	13	0.5	13	0	0.000311491	protein kinase
Zm_eQTL_HS52	GRMZM2G124026	25	13	0.52	6	7	0.781511	hypothetical protein [Zea mays]
Zm_eQTL_HS52	GRMZM2G307368	23	10	0.434783	3	7	0.205903	drought-induced protein 1
Zm_eQTL_HS52	GRMZM2G346207	22	11	0.5	5	6	0.763025	erfl1_arath ame: full=ethylene-responsive transcription factor-like protein at4g13040
Zm_eQTL_HS52	GRMZM2G423643	25	12	0.48	5	7	0.563703	hydroxyproline-rich glyco
Zm_eQTL_HS53	GRMZM2G038497	34	15	0.441176	9	6	0.438578	hypothetical protein SORBIDRAFT_04g021620 [Sorghum bicolor]
Zm_eQTL_HS53	GRMZM2G038669	36	17	0.472222	10	7	0.466854	pan domain-containing protein
Zm_eQTL_HS53	GRMZM2G039089	31	14	0.451613	9	5	0.28505	chaperone protein dnaj-related-like
Zm_eQTL_HS53	GRMZM2G059671	33	16	0.484848	7	9	0.617075	ctr1-like protein kinase
Zm_eQTL_HS53	GRMZM2G115491	36	22	0.611111	11	11	1	germin-like protein
Zm_eQTL_HS53	GRMZM2G172158	36	18	0.5	10	8	0.637352	ubiquitin carboxyl-terminal hydrolase-like protein
Zm_eQTL_HS53	GRMZM2G074040	35	14	0.4	8	6	0.59298	SOUL heme-binding protein
Zm_eQTL_HS54	GRMZM2G159660	45	26	0.577778	22	4	0.000415418	alkaline phosphatase D
Zm_eQTL_HS54	GRMZM2G052699	43	21	0.488372	17	4	0.00455635	catalytic protein phosphatase type 2c
Zm_eQTL_HS54	GRMZM2G061700	45	18	0.4	16	2	0.000967428	at3g20300 mqc12_5
Zm_eQTL_HS54	GRMZM2G099989	47	21	0.446809	19	2	0.000207502	---NA---
Zm_eQTL_HS54	GRMZM2G113596	46	19	0.413043	17	2	0.000579063	ankyrin repeat-containing protein
Zm_eQTL_HS54	GRMZM5G861269	44	24	0.545455	20	4	0.00109084	microtubule motor
Zm_eQTL_HS54	GRMZM2G115420	44	28	0.636364	24	4	0.000157052	somatic embryogenesis receptor-like kinase2
Zm_eQTL_HS55	GRMZM2G046459	77	36	0.467532	24	12	0.0455003	beta- -glucanase precursor
Zm_eQTL_HS55	GRMZM2G134552	77	32	0.415584	20	12	0.157299	unknown [Zea mays]
Zm_eQTL_HS55	GRMZM2G161800	77	39	0.506494	27	12	0.0163092	cyclic nucleotide-binding transporter 1
Zm_eQTL_HS55	GRMZM2G163749	77	42	0.545455	27	15	0.0640775	cucumisin-like serine protease subtilisin-like protease
Zm_eQTL_HS55	GRMZM2G385925	71	30	0.422535	20	10	0.0678892	kinesin motor protein
Zm_eQTL_HS55	GRMZM5G886335	77	39	0.506494	27	12	0.0163092	hypothetical protein SORBIDRAFT_04g034765 [Sorghum bicolor]
Zm_eQTL_HS56	GRMZM2G057091	54	24	0.444444	20	4	0.00109084	domain containing expressed
Zm_eQTL_HS56	GRMZM2G334584	55	23	0.418182	20	3	0.000392993	RXO1 disease resistance protein
Zm_eQTL_HS57	GRMZM2G155252	147	60	0.408163	53	7	2.87511e-09	tyrosine specific protein phosphatase-like
Zm_eQTL_HS57	GRMZM2G168017	147	76	0.517007	66	10	1.33053e-10	syntaxin-related protein knolle
Zm_eQTL_HS57	GRMZM2G301803	144	79	0.548611	67	12	6.09387e-10	non-phototropic hypocotyl 3 phototropic response protein
Zm_eQTL_HS57	GRMZM2G319402	147	60	0.408163	54	6	5.76324e-10	---NA---
Zm_eQTL_HS57	GRMZM2G019225	142	69	0.485915	61	8	1.76568e-10	PREDICTED: protein CHUP1, chloroplastic-like
Zm_eQTL_HS58	GRMZM2G053397	50	22	0.44	4	18	0.00283754	cycloeucalenol cycloisomerase
Zm_eQTL_HS58	GRMZM5G832409	52	30	0.576923	9	21	0.0284597	Homeobox protein knotted-1-like 5 Fragment
Zm_eQTL_HS58	GRMZM2G099186	51	21	0.411765	7	14	0.12663	unknown [Zea mays]
Zm_eQTL_HS58	GRMZM2G479746	50	20	0.4	4	16	0.00729036	lipase precursor
Zm_eQTL_HS59	GRMZM2G047720	29	14	0.482759	11	3	0.0325094	threonine endopeptidase
Zm_eQTL_HS59	GRMZM2G074454	28	13	0.464286	11	2	0.0125549	ketose-bisphosphate aldolase class-ii-like protein
Zm_eQTL_HS59	GRMZM2G132373	33	15	0.454545	13	2	0.0045087	fyve finger-containing phosphoinositide kinase-like
Zm_eQTL_HS59	GRMZM2G382711	21	10	0.47619	8	2	0.0577796	unknown [Zea mays]
Zm_eQTL_HS59	GRMZM2G010433	25	10	0.4	10	0	0.0015654	PREDICTED: vacuolar amino acid transporter 1-like
Zm_eQTL_HS59	GRMZM2G010960	30	15	0.5	13	2	0.0045087	putative pollen-specific LIM domain protein (transcription factor activity)
Zm_eQTL_HS60	GRMZM2G420758	161	82	0.509317	59	23	7.02212e-05	disease resistance response protein 206
Zm_eQTL_HS60	GRMZM2G120575	161	65	0.403727	39	26	0.106864	transposon unclassified
Zm_eQTL_HS60	GRMZM2G120652	161	82	0.509317	56	26	0.000923189	ethylene-inducible protein
Zm_eQTL_HS60	GRMZM2G135739	161	85	0.52795	63	22	8.70477e-06	monosaccharide transporter1
Zm_eQTL_HS60	GRMZM2G018926	161	75	0.465839	52	23	0.000812117	PREDICTED: nipped-B-like protein-like
Zm_eQTL_HS61	GRMZM2G358059	50	20	0.4	5	15	0.0253473	Calreticulin Precursor
Zm_eQTL_HS61	GRMZM2G030809	53	23	0.433962	4	19	0.0017617	hypothetical protein [Zea mays]
Zm_eQTL_HS61	GRMZM2G106903	53	22	0.415094	6	16	0.0330063	rna recognition motif -containing
Zm_eQTL_HS61	GRMZM2G311969	53	30	0.566038	8	22	0.0105871	---NA---
Zm_eQTL_HS61	GRMZM2G320703	51	28	0.54902	5	23	0.000669729	speckle-type poz protein
Zm_eQTL_HS61	GRMZM5G896560	51	26	0.509804	6	20	0.00603956	---NA---
Zm_eQTL_HS62	GRMZM2G047592	77	36	0.467532	10	26	0.00766076	aldose 1-epimerase family protein
Zm_eQTL_HS62	GRMZM2G138012	74	32	0.432432	9	23	0.0133283	pentatricopeptide repeat-containing
Zm_eQTL_HS62	GRMZM5G825192	77	39	0.506494	10	29	0.00234673	nbs-lrr disease resistance
Zm_eQTL_HS62	GRMZM5G843174	78	42	0.538462	15	27	0.0640775	retrotransposon protein
Zm_eQTL_HS63	GRMZM2G040947	27	13	0.481481	8	5	0.405381	pentatricopeptide repeat-containing
Zm_eQTL_HS63	GRMZM2G061620	26	12	0.461538	5	7	0.563703	dna repair protein rad23
Zm_eQTL_HS63	GRMZM2G092550	27	13	0.481481	7	6	0.781511	kinase family protein
Zm_eQTL_HS63	GRMZM5G851051	22	10	0.454545	6	4	0.527089	inorganic carbon transport protein
Zm_eQTL_HS63	GRMZM2G048277	25	11	0.44	6	5	0.763025	peptidyl-prolyl cis-trans isomerase NIMA-interacting 4
Zm_eQTL_HS64	GRMZM2G007249	72	34	0.472222	20	14	0.303484	1-aminocyclopropane-1-carboxylate oxidase
Zm_eQTL_HS64	GRMZM2G145101	72	36	0.5	20	16	0.504985	carbonic anhydrase
Zm_eQTL_HS64	GRMZM2G076778	67	27	0.402985	16	11	0.335924	hypothetical protein [Zea mays]
Zm_eQTL_HS64	GRMZM2G076802	72	39	0.541667	23	16	0.262332	dnaj heat shock n-terminal domain-containing
Zm_eQTL_HS64	GRMZM2G090739	72	39	0.541667	17	22	0.42334	hypothetical protein [Zea mays]
Zm_eQTL_HS64	GRMZM2G034917	72	31	0.430556	14	17	0.590014	PREDICTED: probable carboxylesterase 2-like
Zm_eQTL_HS65	GRMZM2G046829	274	142	0.518248	37	105	1.15368e-08	axial regulator YABBY2
Zm_eQTL_HS65	GRMZM2G153454	274	115	0.419708	33	82	4.89418e-06	DNA binding protein
Zm_eQTL_HS65	GRMZM2G008309	274	119	0.434307	36	83	1.64378e-05	fiber expressed protein
Zm_eQTL_HS65	GRMZM2G041645	274	137	0.5	36	101	2.80287e-08	gpi-anchored protein
Zm_eQTL_HS65	GRMZM2G051090	272	113	0.415441	38	75	0.000500167	f-box domain containing protein
Zm_eQTL_HS65	GRMZM2G057475	274	137	0.5	34	103	3.74527e-09	d-erythro-sphingosine kinase diacylglycerol kinase
Zm_eQTL_HS65	GRMZM2G158452	274	121	0.441606	33	88	5.73303e-07	pentatricopeptide repeat-containing protein
Zm_eQTL_HS65	GRMZM2G305280	274	156	0.569343	48	108	1.55648e-06	---NA---
Zm_eQTL_HS65	GRMZM2G434277	274	110	0.40146	34	76	6.21375e-05	leucine-rich repeat transmembrane protein kinase 1
Zm_eQTL_HS65	GRMZM5G832281	271	128	0.472325	42	86	0.000100622	unknown [Zea mays]
Zm_eQTL_HS65	GRMZM5G841684	274	114	0.416058	37	77	0.000179431	---NA---
Zm_eQTL_HS65	GRMZM2G700291	274	120	0.437956	37	83	2.67852e-05	putative symbiosis receptor-like kinase
Zm_eQTL_HS66	GRMZM2G097456	123	70	0.569106	47	23	0.0041236	GRAS family transcription factor containing protein
Zm_eQTL_HS66	GRMZM2G017016	124	56	0.451613	35	21	0.0613688	abi3-interacting protein 2 2
Zm_eQTL_HS66	GRMZM2G092752	124	63	0.508065	38	25	0.101454	---NA---
Zm_eQTL_HS66	GRMZM2G098517	124	53	0.427419	32	21	0.130797	chitin-inducible gibberellin-responsive protein
Zm_eQTL_HS66	GRMZM2G053338	124	50	0.403226	29	21	0.257899	indole-3-acetic acid-amido synthetase GH3.8
Zm_eQTL_HS66	GRMZM2G089630	121	50	0.413223	29	21	0.257899	integral membrane protein like
Zm_eQTL_HS66	GRMZM2G167932	124	63	0.508065	42	21	0.00815097	RNA binding protein
Zm_eQTL_HS67	GRMZM2G041231	55	24	0.436364	8	16	0.10247	pentatricopeptide repeat-containing protein
Zm_eQTL_HS67	GRMZM2G128080	55	23	0.418182	8	15	0.1444	translin-associated protein x
Zm_eQTL_HS68	GRMZM2G098015	44	20	0.454545	10	10	1	---NA---
Zm_eQTL_HS68	GRMZM2G334457	44	20	0.454545	9	11	0.654721	hypothetical protein SORBIDRAFT_03g008490 [Sorghum bicolor]
Zm_eQTL_HS68	GRMZM2G035341	44	18	0.409091	7	11	0.345779	RING-box protein 1a
Zm_eQTL_HS69	GRMZM2G175398	95	39	0.410526	6	33	1.53601e-05	hypothetical protein SORBIDRAFT_03g007280 [Sorghum bicolor]
Zm_eQTL_HS69	GRMZM2G112968	99	46	0.464646	10	36	0.000126337	putative bifunctional nuclease
Zm_eQTL_HS69	GRMZM2G153766	99	41	0.414141	11	30	0.00300426	surfeit locus protein 5 (LOC100284536), mRNA
Zm_eQTL_HS70	GRMZM2G004083	45	18	0.4	10	8	0.637352	alkaline phytoceramidase
Zm_eQTL_HS70	GRMZM2G058366	46	21	0.456522	12	9	0.512691	programmed cell death protein
Zm_eQTL_HS70	GRMZM2G075992	45	18	0.4	11	7	0.345779	protein kinase
Zm_eQTL_HS70	GRMZM2G127650	47	21	0.446809	12	9	0.512691	s-domain receptor-like protein kinase
Zm_eQTL_HS70	GRMZM2G154278	45	18	0.4	11	7	0.345779	pre-mrna-splicing factor cwc15
Zm_eQTL_HS71	GRMZM2G043238	70	31	0.442857	9	22	0.0195503	hasty_arath ame: full=protein hasty 1 ame: full=protein hasty
Zm_eQTL_HS71	GRMZM2G077546	71	39	0.549296	9	30	0.000771866	solute carrier family facilitated glucose transporter member 8
Zm_eQTL_HS71	GRMZM2G102933	72	39	0.541667	11	28	0.00648531	aspartic proteinase
Zm_eQTL_HS71	GRMZM2G133070	72	36	0.5	8	28	0.000858121	---NA---
Zm_eQTL_HS71	GRMZM2G020291	73	34	0.465753	9	25	0.00606997	PREDICTED: protein SUPPRESSOR OF PHYA-105 1-like
Zm_eQTL_HS72	GRMZM2G030165	86	43	0.5	8	35	3.83069e-05	BC10 protein
Zm_eQTL_HS72	GRMZM2G110509	86	46	0.534884	8	38	9.72232e-06	elongation factor alpha6
Zm_eQTL_HS72	GRMZM2G058456	87	36	0.413793	5	31	1.46868e-05	abil4_orysj ame: full=probable protein abil4 ame: full=abl interactor-like protein 4
Zm_eQTL_HS72	GRMZM2G074645	87	44	0.505747	11	33	0.000911119	transcription factor qsh-1
Zm_eQTL_HS72	GRMZM2G075651	86	48	0.55814	9	39	1.49023e-05	nad h-quinone oxidoreductase subunit h
Zm_eQTL_HS72	GRMZM2G088088	88	36	0.409091	8	28	0.000858121	ima1b_orysj ame: full=importin subunit alpha-1b
Zm_eQTL_HS72	GRMZM2G449496	84	41	0.488095	7	34	2.47913e-05	protein plastid transcriptionally active 16
Zm_eQTL_HS72	GRMZM2G509876	88	54	0.613636	10	44	3.71334e-06	hypothetical protein [Zea mays]
Zm_eQTL_HS72	GRMZM5G830596	88	38	0.431818	8	30	0.000358523	na+ k+ cl-cotransport protein
Zm_eQTL_HS72	GRMZM5G884544	86	38	0.44186	5	33	5.56702e-06	dna binding protein
Zm_eQTL_HS72	GRMZM2G073888	81	33	0.407407	6	27	0.00025655	Tubulin gamma-1 chain (Gamma-1-tubulin)
Zm_eQTL_HS73	GRMZM2G055684	43	18	0.418605	3	15	0.00467774	subtilisin-like protease
Zm_eQTL_HS73	GRMZM2G070369	50	22	0.44	3	19	0.000646749	---NA---
Zm_eQTL_HS73	GRMZM2G102745	50	21	0.42	2	19	0.000207502	mitochondrial carrier protein
Zm_eQTL_HS74	GRMZM2G114954	55	23	0.418182	5	18	0.00671439	60S acidic ribosomal protein P2B
Zm_eQTL_HS74	GRMZM2G053322	55	24	0.436364	5	19	0.00426673	UDP-sulfoquinovose synthase
Zm_eQTL_HS75	GRMZM5G827266	34	21	0.617647	15	6	0.0495346	40S ribosomal protein S26
Zm_eQTL_HS75	GRMZM2G009968	33	15	0.454545	8	7	0.796253	electron transporter
Zm_eQTL_HS75	GRMZM2G073347	33	16	0.484848	11	5	0.133614	hypothetical protein SORBIDRAFT_09g024260 [Sorghum bicolor]
Zm_eQTL_HS75	GRMZM5G831519	35	17	0.485714	13	4	0.029049	prenylated rab receptor 2
Zm_eQTL_HS75	GRMZM2G030673	34	16	0.470588	10	6	0.317311	putative calcium-dependent protein kinase
Zm_eQTL_HS75	GRMZM2G132663	32	13	0.40625	9	4	0.165518	transposon protein CACTA, En/Spm sub-class
Zm_eQTL_HS76	GRMZM2G176638	47	20	0.425532	19	1	5.69941e-05	zinc finger family protein
Zm_eQTL_HS76	GRMZM2G180372	57	24	0.421053	23	1	7.09791e-06	hypothetical protein SORBIDRAFT_03g043990 [Sorghum bicolor]
Zm_eQTL_HS76	GRMZM2G100402	57	25	0.438596	24	1	4.22491e-06	mitochondrial import receptor subunit TOM20
Zm_eQTL_HS77	GRMZM2G311220	61	35	0.57377	23	12	0.0629791	calcium-dependent protein kinase, isoform AK1
Zm_eQTL_HS77	GRMZM2G046418	61	29	0.47541	18	11	0.193647	bcl-2 binding anthanogene-1
Zm_eQTL_HS77	GRMZM2G328341	63	33	0.52381	22	11	0.0555111	hypothetical protein [Zea mays]
Zm_eQTL_HS77	GRMZM5G801793	61	31	0.508197	21	10	0.0481935	v-type proton atpase 116 kda subunit a isoform
Zm_eQTL_HS77	GRMZM2G085600	62	26	0.419355	17	9	0.116665	Ubiquitin carrier protein
Zm_eQTL_HS78	GRMZM2G110289	66	28	0.424242	21	7	0.00815097	nucleotide-binding oligomerization domain-containing protein
Zm_eQTL_HS78	GRMZM5G811223	66	37	0.560606	30	7	0.000156089	hypothetical protein SORBIDRAFT_10g008870 [Sorghum bicolor]
Zm_eQTL_HS78	GRMZM2G027627	66	31	0.469697	26	5	0.000162132	pyruvate dehydrogenase E1 component alpha subunit
Zm_eQTL_HS79	GRMZM2G081239	60	25	0.416667	15	10	0.317311	Aquaporin NIP2-3 (NOD26-like intrinsic protein 2-3)(ZmNIP2-3)(ZmNIP2;3)
Zm_eQTL_HS79	GRMZM2G046618	59	27	0.457627	16	11	0.335924	pectin methylesterase
Zm_eQTL_HS79	GRMZM2G171752	59	34	0.576271	22	12	0.0863478	hypothetical protein [Zea mays]
Zm_eQTL_HS79	GRMZM5G852704	59	32	0.542373	23	9	0.0133283	dehydration-responsive element binding protein 3
Zm_eQTL_HS80	GRMZM2G079306	42	20	0.47619	5	15	0.0253473	hydrophobic protein LTI6B (LOC100285363), mRNA
Zm_eQTL_HS80	GRMZM5G834697	42	26	0.619048	4	22	0.000415418	map kinase kinase 5
Zm_eQTL_HS80	GRMZM2G031588	42	20	0.47619	3	17	0.00174512	pentatricopeptide (PPR) repeat-containing protein-like
Zm_eQTL_HS80	GRMZM2G016323	44	18	0.409091	4	14	0.0184221	putative ubiquitin-specific protease 23
Zm_eQTL_HS81	GRMZM2G024005	25	10	0.4	9	1	0.011412	DNA-binding protein-like
Zm_eQTL_HS81	GRMZM2G003488	25	13	0.52	13	0	0.000311491	extra-large G-protein-like
Zm_eQTL_HS81	GRMZM2G393988	25	12	0.48	11	1	0.00389242	---NA---
Zm_eQTL_HS81	GRMZM2G027860	25	11	0.44	10	1	0.00665561	putative Potential phospholipid-transporting ATPase 8
Zm_eQTL_HS82	GRMZM2G055243	27	12	0.444444	10	2	0.0209213	Homeobox protein knotted-1-like 2 Fragment
Zm_eQTL_HS82	GRMZM2G048919	29	13	0.448276	11	2	0.0125549	sterile alpha motif domain-containing protein
Zm_eQTL_HS82	GRMZM2G050912	27	12	0.444444	10	2	0.0209213	unknown (transcription factor activity) [Zea mays]
Zm_eQTL_HS82	GRMZM2G139973	29	14	0.482759	12	2	0.00752632	elongator complex protein 4
Zm_eQTL_HS83	GRMZM2G110988	41	19	0.463415	14	5	0.0389475	retrotransposon protein
Zm_eQTL_HS83	GRMZM2G144730	41	25	0.609756	18	7	0.0278069	pyruvate kinase
Zm_eQTL_HS83	GRMZM2G148216	42	22	0.52381	18	4	0.00283754	casein kinase ii subunit beta-4
Zm_eQTL_HS83	GRMZM2G368765	42	21	0.5	16	5	0.0163773	ring-h2 finger protein atl3j
Zm_eQTL_HS83	GRMZM2G019029	40	16	0.4	10	6	0.317311	PREDICTED: phospholipase D alpha 1-like
Zm_eQTL_HS83	GRMZM2G034110	41	19	0.463415	15	4	0.0116169	transcription factor MYBS3
Zm_eQTL_HS84	GRMZM2G147775	41	18	0.439024	11	7	0.345779	actin depolymerizing factor 5
Zm_eQTL_HS84	GRMZM2G175642	39	16	0.410256	5	11	0.133614	hypothetical protein [Zea mays]
Zm_eQTL_HS84	GRMZM2G140799	36	16	0.444444	7	9	0.617075	NHP2-like protein 1
Zm_eQTL_HS84	GRMZM2G159777	33	18	0.545455	9	9	1	translocon at outer membrane of chloroplast34
Zm_eQTL_HS85	GRMZM2G031925	34	16	0.470588	9	7	0.617075	hypothetical protein [Zea mays]
Zm_eQTL_HS85	GRMZM2G057753	32	13	0.40625	8	5	0.405381	uncharacterized plant-specific domain tigr01568 family expressed
Zm_eQTL_HS85	GRMZM2G148404	32	16	0.5	8	8	1	unknown [Zea mays]
Zm_eQTL_HS85	GRMZM2G027522	35	15	0.428571	11	4	0.0707012	TPD1
Zm_eQTL_HS86	GRMZM2G059214	57	24	0.421053	17	7	0.0412268	leucine rich repeat family expressed
Zm_eQTL_HS86	GRMZM2G004060	57	25	0.438596	16	9	0.161513	WRKY-type transcription factor 45-2
Zm_eQTL_HS87	GRMZM2G054393	30	13	0.433333	8	5	0.405381	hypothetical protein [Zea mays]
Zm_eQTL_HS87	GRMZM2G088689	30	12	0.4	6	6	1	2-oxoisovalerate dehydrogenase alpha mitochondrial expressed
Zm_eQTL_HS87	GRMZM2G028307	30	15	0.5	7	8	0.796253	putative alpha-galactosidase
Zm_eQTL_HS87	GRMZM2G181258	30	15	0.5	8	7	0.796253	Thioredoxin M-type, chloroplastic Precursor (Trx-M)
Zm_eQTL_HS88	GRMZM2G110145	42	17	0.404762	15	2	0.00161622	cellulose synthase-like 6
Zm_eQTL_HS88	GRMZM2G145123	43	20	0.465116	15	5	0.0253473	zinc finger (c3hc4-type ring finger)
Zm_eQTL_HS88	GRMZM2G165757	41	17	0.414634	15	2	0.00161622	abc transporter 1
Zm_eQTL_HS88	GRMZM2G178014	43	20	0.465116	14	6	0.0736383	esterase lipase domain-containing protein
Zm_eQTL_HS89	GRMZM2G109062	71	39	0.549296	35	4	6.90656e-07	esterase ydii
Zm_eQTL_HS89	GRMZM2G122943	71	39	0.549296	35	4	6.90656e-07	soluble diacylglycerol acyltransferase
Zm_eQTL_HS89	GRMZM2G337143	71	36	0.507042	32	4	3.06125e-06	at4g02920 t4i9_20
Zm_eQTL_HS89	GRMZM2G032684	67	31	0.462687	28	3	7.11789e-06	PREDICTED: inositol 2-dehydrogenase 1-like isoform 1
Zm_eQTL_HS89	GRMZM2G004957	71	34	0.478873	30	4	8.23571e-06	TPA_exp: homeodomain leucine zipper family IV protein
Zm_eQTL_HS91	GRMZM2G027173	40	16	0.4	13	3	0.0124193	ELMO domain-containing protein 2
Zm_eQTL_HS91	GRMZM2G063972	38	16	0.421053	13	3	0.0124193	heat shock protein binding protein
Zm_eQTL_HS91	GRMZM2G016819	40	18	0.45	13	5	0.0593464	at3g58520 f14p22_110
Zm_eQTL_HS91	GRMZM2G018027	39	18	0.461538	13	5	0.0593464	hypothetical protein SORBIDRAFT_06g026470 [Sorghum bicolor]
Zm_eQTL_HS91	GRMZM2G054418	40	24	0.6	18	6	0.0143059	kinesin heavy chain
Zm_eQTL_HS91	GRMZM2G054615	40	21	0.525	17	4	0.00455635	gata zinc finger family protein (transcription factor activity)
Zm_eQTL_HS91	GRMZM2G322506	40	20	0.5	16	4	0.00729036	dna polymerase alpha-associated dna helicase a
Zm_eQTL_HS91	GRMZM2G005353	38	16	0.421053	13	3	0.0124193	yabby14 protein
Zm_eQTL_HS92	GRMZM2G010290	39	16	0.410256	9	7	0.617075	dof zinc finger protein
Zm_eQTL_HS92	GRMZM2G149178	42	22	0.52381	11	11	1	Histone H4
Zm_eQTL_HS92	AC233979.1_FG007	38	16	0.421053	10	6	0.317311	hypothetical protein LOC100304004
Zm_eQTL_HS92	AC233979.1_FG008	39	19	0.487179	12	7	0.251349	hypothetical protein LOC100277093 (LOC100277093), mRNA
Zm_eQTL_HS92	GRMZM2G072121	40	19	0.475	12	7	0.251349	expansin precursor protein
Zm_eQTL_HS92	GRMZM2G098676	39	16	0.410256	10	6	0.317311	fringe expressed
Zm_eQTL_HS92	GRMZM2G127821	39	25	0.641026	16	9	0.161513	hypothetical protein SORBIDRAFT_06g024020 [Sorghum bicolor]
Zm_eQTL_HS93	GRMZM2G112057	42	20	0.47619	15	5	0.0253473	calcium-dependent protein kinase
Zm_eQTL_HS93	GRMZM2G429000	43	23	0.534884	19	4	0.0017617	GR1a protein
Zm_eQTL_HS93	AF466202.2_FG008	42	17	0.404762	16	1	0.000274727	NA
Zm_eQTL_HS93	GRMZM2G061398	41	20	0.487805	17	3	0.00174512	bzip protein
Zm_eQTL_HS93	GRMZM2G084491	41	17	0.414634	15	2	0.00161622	cholesterol transport protein
Zm_eQTL_HS93	GRMZM2G344476	41	17	0.414634	13	4	0.029049	palmitoyl- hydrolase
Zm_eQTL_HS93	GRMZM2G360519	43	26	0.604651	22	4	0.000415418	lysine histidine transporter
Zm_eQTL_HS94	GRMZM2G031354	56	25	0.446429	15	10	0.317311	36.4 kDa proline-rich protein
Zm_eQTL_HS94	GRMZM2G057567	56	24	0.428571	11	13	0.683091	unknown [Zea mays]
Zm_eQTL_HS94	GRMZM2G137009	55	30	0.545455	20	10	0.0678892	hypothetical protein SORBIDRAFT_03g042780 [Sorghum bicolor]
Zm_eQTL_HS94	GRMZM2G156145	52	22	0.423077	13	9	0.393769	26s proteasome regulatory subunit
Zm_eQTL_HS94	GRMZM2G129147	56	32	0.571429	17	15	0.723674	putative growth-regulating factor 5
Zm_eQTL_HS95	GRMZM2G008730	220	100	0.454545	32	68	0.000318217	chlorophyll a/b-binding apoprotein CP26 precursor
Zm_eQTL_HS95	GRMZM2G098290	220	89	0.404545	26	63	8.78199e-05	Glutamine synthetase, chloroplastic Precursor (EC 6.3.1.2)(GS2)(Glutamate--ammonia ligase)
Zm_eQTL_HS95	GRMZM2G076602	221	114	0.515837	35	79	3.77268e-05	floral homeotic protein apetala 2 (transcription factor activity)
Zm_eQTL_HS95	GRMZM2G086030	220	113	0.513636	28	85	8.22559e-08	eukaryotic translation initiation factor 3
Zm_eQTL_HS95	GRMZM2G104294	220	111	0.504545	32	79	8.15619e-06	nadph-cytochrome p450 oxydoreductase isoform 3
Zm_eQTL_HS95	GRMZM5G866734	220	99	0.45	27	72	6.10644e-06	regulator of chromosome condensation family protein
Zm_eQTL_HS96	GRMZM2G011513	87	43	0.494253	8	35	3.83069e-05	C2 domain-containing protein
Zm_eQTL_HS96	GRMZM2G106647	87	44	0.505747	8	36	2.4305e-05	CsAtPR5Putative uncharacterized protein ;
Zm_eQTL_HS96	GRMZM2G043903	87	36	0.413793	6	30	6.33425e-05	hypothetical protein [Zea mays]
Zm_eQTL_HS96	GRMZM2G142718	88	48	0.545455	7	41	9.22553e-07	tpa_inf: dof-type zinc finger protein 21 (transcription factor activity)
Zm_eQTL_HS96	GRMZM2G173660	88	46	0.522727	8	38	9.72232e-06	mis12 protein
Zm_eQTL_HS96	GRMZM2G142743	88	36	0.409091	5	31	1.46868e-05	N-acetylglucosaminyl-phosphatidylinositol de-N-acetylase
